# Supplementary material
Source: MDPI journal article supplement (https://www.mdpi.com/1424-8247/16/4/500)

**Supplementary Table S1: Clinical characteristics and laboratory findings in KD patients and healthy controls**

| Characteristics           | Kawasaki disease       |                |                        |                | Healthy Control |
|---------------------------|------------------------|----------------|------------------------|----------------|-----------------|
|                           | KD with CAA            | <i>p</i> value | KD without CAA         | <i>p</i> value |                 |
| Male/female               | 6/2                    |                | 11/7                   |                | 5/15            |
| Age, month                | 32.63 ± 6.24           | 0.895          | 31.44 ± 4.51           | 0.936          | 29.67 ± 2.43    |
| Weight (kg)               | 13.75 ± 1.84           | 0.577          | 13.21 ± 0.87           | 0.708          | 12.34 ± 0.40    |
| Days of fever             | 5.13 ± 0.55            |                | 5.06 ± 0.32            |                | -               |
| Other symptoms            |                        |                |                        |                |                 |
| Rash                      | 6/8                    |                | 15/18                  |                | -               |
| Conjunctivitis            | 8/8                    |                | 17/18                  |                | -               |
| Oral changes              | 7/8                    |                | 18/18                  |                | -               |
| Palmar and                | 3/8                    |                | 7/18                   |                | -               |
| plantar erythema          |                        |                |                        |                |                 |
| Cervical                  | 7/8                    |                | 16/18                  |                | -               |
| adenopathy                |                        |                |                        |                |                 |
| WBC (×10 <sup>9</sup> /L) | 15.17 ± 2.19           | 0.002          | 14.00 ± 1.20           | 0.001          | 8.69 ± 0.48     |
| N (×10 <sup>9</sup> /L)   | 11.87 ± 1.35           | <0.0001        | 9.72 ± 1.41            | 0.0001         | 3.15 ± 0.27     |
| N (%)                     | 80.13 ± 2.66           | <0.0001        | 64.88 ± 4.75*          | <0.0001        | 35.83 ± 2.10    |
| PLT (×10 <sup>9</sup> /L) | 340.50 ± 32.33         | 0.719          | 364.90 ± 28.46         | 0.393          | 309.30 ± 19.63  |
| CRP (mg/L)                | 75.71 ± 14.33          | <0.0001        | 47.40 ± 7.84           | <0.0001        | 1.05 ± 0.59     |
| ESR (mm/h)                | 44.38 ± 7.95           |                | 60.61 ± 5.46           |                | -               |
| IL-2 (pg/mL)              | 3.40 (3.18, 4.40)      |                | 3.36 (2.78, 3.50)      |                | -               |
| IL-4 (pg/mL)              | 2.95 (2.60, 3.30)      |                | 2.33 (2.03, 2.60) **   |                | -               |
| IL-6 (pg/mL)              | 231.20 (72.93, 610.90) |                | 65.40 (22.85, 178.10)  |                | -               |
| IL-10 (pg/mL)             | 18.10 (8.03, 78.73)    |                | 7.25 (3.20, 14.31) *   |                | -               |
| TNF-α (pg/mL)             | 1.25 (1.00, 3.43)      |                | 1.50 (1.20, 1.72)      |                | -               |
| IFN-γ (pg/mL)             | 6.30 (4.93, 21.83)     |                | 2.70 (1.70, 2.95) **** |                | -               |

All *p* values are for patients compared with healthy controls. \**p* <0.05, \*\**p* <0.01, \*\*\*\**p* <0.0001 versus KD with CAA. WBC, white blood cell; N, neutrophil; PLT, platelet; CRP, C-reactive protein; ESR, erythrocyte sedimentation rate; IL, interleukin.

**Supplementary Figure S1: Full-length blots**

Full-length blots for Figure 2

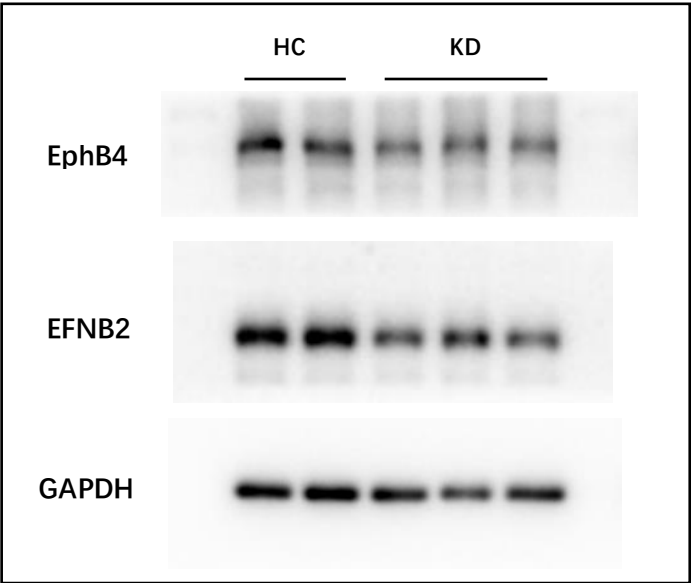

Full-length blots for Figure 3

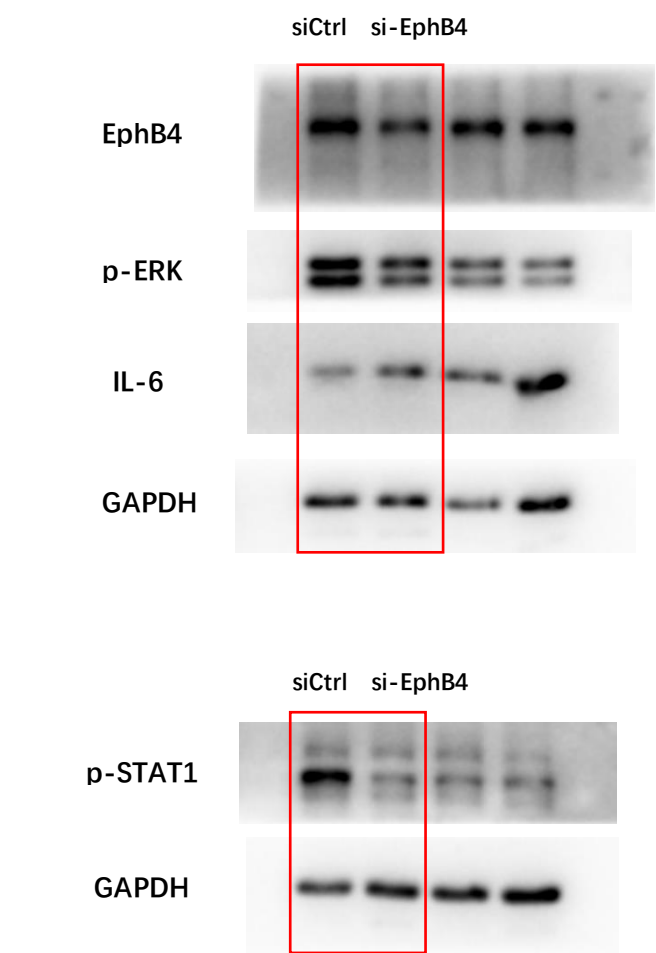

Full-length blots for Figure 4

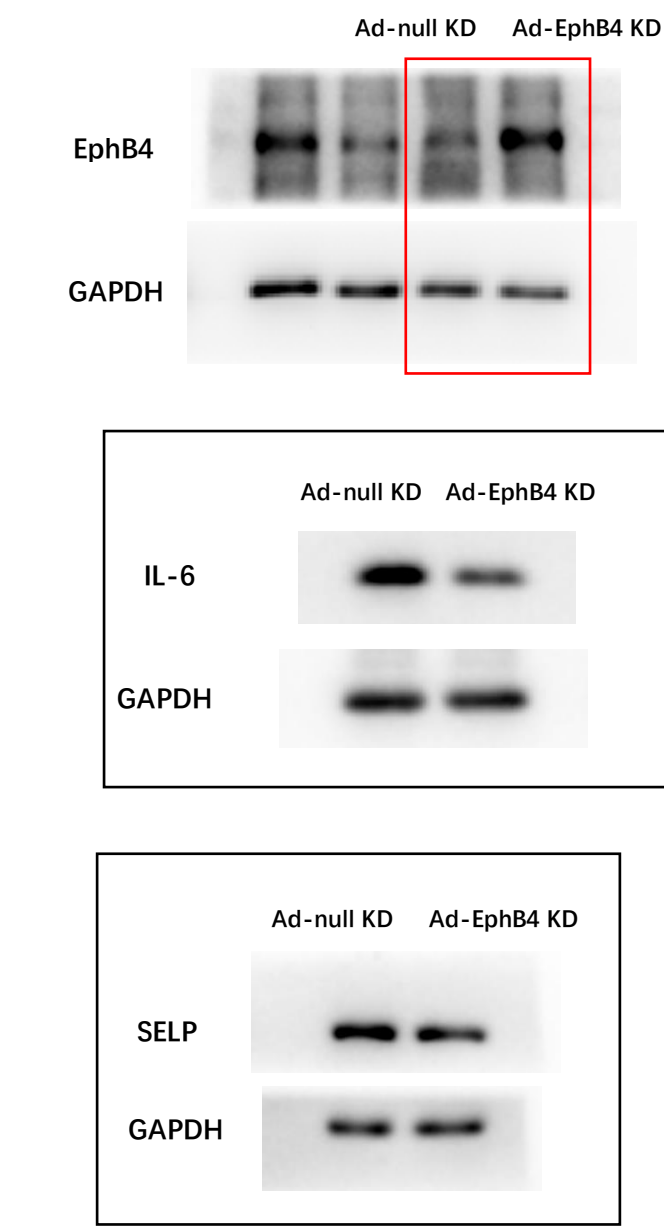

Full-length blots for Figure 5

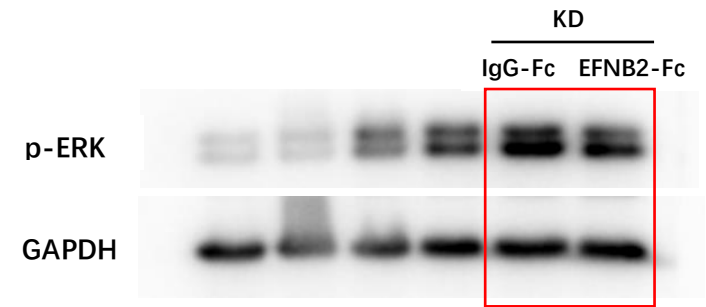

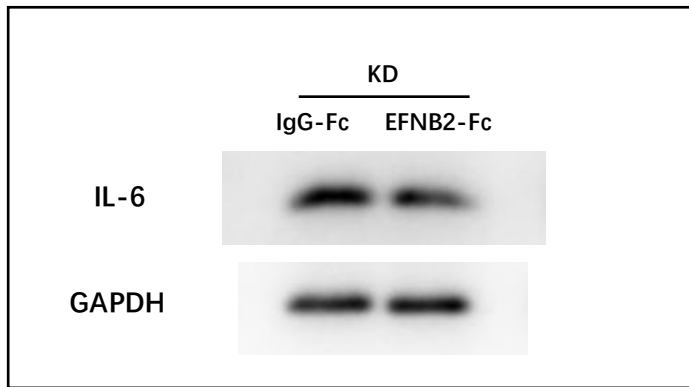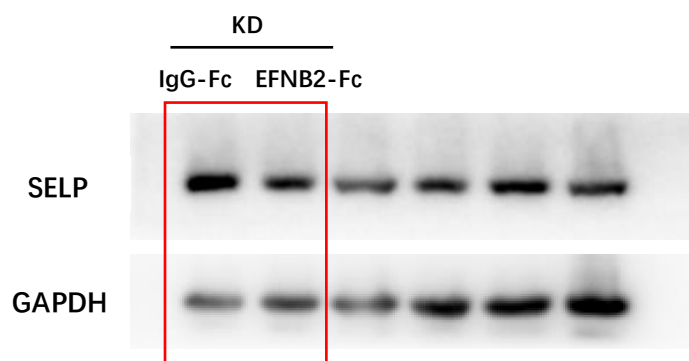

Supplement: s1 [file s1]
